# Supplementary material for: Process knowledge for drug substance production via kinetic modeling, parameter estimability analysis and reaction optimization
Source: Royal Society of Chemistry journal article supplement (doi:10.1039/d4re00210e), 2024-01-01
Supplement: d4re00210e1.pdf [file d4re00210e1.pdf]

## Nomenclature

### Acronyms

|      |                                         |
|------|-----------------------------------------|
| DMF  | Dimethylformamide                       |
| DMI  | Demethylated Impurity                   |
| EVM  | Error-in-Variables-Model                |
| FPCA | Functional Principal Component Analysis |
| HIV  | Human Immunodeficiency Virus            |
| Int  | Intermediate                            |
| lb   | lower bound                             |
| MeCl | Methyl Chloride                         |
| MeF  | Methyl Fluoride                         |
| MSD  | Merck Sharp & Dohme                     |
| MSE  | Mean-Squared-Error                      |
| NE   | Not Estimated                           |
| ODE  | Ordinary Differential Equation          |
| P    | Product                                 |
| QS   | Quaternary Salt                         |
| RMSE | Root-mean-squared Error                 |
| SM   | Starting Material                       |
| THP  | Tetrahydropyran                         |
| TMA  | Trimethyl amine                         |
| ub   | upper bound                             |

### Symbols

|                  |                                                                     |
|------------------|---------------------------------------------------------------------|
| $C_{Cl^-}^{sat}$ | Concentration of $Cl^-$ ions in equilibrium with solid $KCl$        |
| $C_{F^-}^{sat}$  | Concentration of $F^-$ ions in equilibrium with solid $KF$          |
| $C_{mTMA0,i}$    | Measured/ target value of initial concentration of $TMA$ in Run $i$ |
| $C_{TMA0,i}$     | True value of initial concentration of $TMA$ in Run $i$             |

|               |                                                                                          |
|---------------|------------------------------------------------------------------------------------------|
| $C_{il}$      | Model prediction of the $l^{th}$ measured concentration in the $i^{th}$ experimental run |
| $C_{SM0}$     | Initial concentration of <i>SM</i>                                                       |
| $d$           | Vector of decision variables                                                             |
| $E_f$         | Activation energy for the forward main reaction                                          |
| $E_{fs}$      | Activation energy for the side reaction                                                  |
| $E_r$         | Activation energy for the reverse main reaction                                          |
| $f$           | Vector of right-hand sides of ODEs                                                       |
| $\Delta H$    | Reaction enthalpy for main reaction                                                      |
| $J_{EVM}$     | EVM objective function                                                                   |
| $J_{WLS}$     | WLS objective function                                                                   |
| $K$           | Equilibrium constant for the main reaction                                               |
| $k_f$         | Forward rate constant for the main reaction                                              |
| $k_{f\ ref}$  | Forward rate constant for the main reaction at $T_{ref}$                                 |
| $k_{fs}$      | Rate constant for the side reaction                                                      |
| $k_{fs\ ref}$ | Rate constant for the side reaction at $T_{ref}$                                         |
| $k_L a$       | Mass transfer coefficient                                                                |
| $k_r$         | Reverse main reaction rate constant                                                      |
| $K_{ref}$     | Equilibrium constant for the main reaction at $T_{ref}$                                  |
| $k_{r\ ref}$  | Reverse main reaction rate constant at $T_{ref}$                                         |
| $R$           | Ideal gas constant                                                                       |
| $S_{KCl}$     | Solubility of solid <i>KCl</i> in the <i>DMF</i> solvent                                 |
| $S_{KF}$      | Solubility of solid <i>KF</i> in the <i>DMF</i> solvent                                  |
| $t$           | time                                                                                     |
| $T$           | Temperature                                                                              |
| $t_f$         | Batch final time                                                                         |
| $T_{ref}$     | Reference temperature                                                                    |
| $V_s$         | Volume of solvent ( <i>DMF</i> )                                                         |

$\mathbf{x}$  Vector of state variables in ODE model,  
 $\mathbf{x} = [SM, TMA, QS1Cl, F^-, QS1F, Cl^-, Int, QS2Cl, QS2F, P, CIDMI, MeCl, MeF, QS3F, FDMI, QS3Cl]^T$

$y_{m,il}$  The  $l^{th}$  measured concentration in the  $i^{th}$  experimental run

### Subscripts

$i$  Counter for the number of experimental runs

$l$  Counter for the number of sampling times

### Greek symbols

$\Gamma$  Coefficient to start mass transfer from solid  $KCl$  to reaction mixture

## **S1. Settings for experimental runs**

Table S1 shows the experimental settings corresponding to 26 runs used for parameter estimation. The first 16 runs are corner-point runs and runs 17 to 24 are center-point replicate runs. The last two runs were conducted without  $KF$ . As a result, only the first two reactions (shown in the blue box in Scheme 1) take place. Prior to developing a [mechanistic](#) model to study the batch reactor, the empirical effect of each experimental factor on the measured responses was investigated. Fifteen empirical models of the following form:

$$y_m = \beta_0 + \beta_1 \frac{KF_0}{SM_0} + \beta_2 \frac{C_{TMA0}}{C_{SM0}} + \beta_3 T + \beta_4 V_s + \varepsilon \quad (S1)$$

were fitted using the available data. In these 15 models,  $y_m$  was the measured concentration of  $SM$ ,  $Int$ ,  $P$ ,  $ClDMI$  or  $FDMI$  obtained at a particular sampling time ( $t = 4.29 h$ ,  $12.29 h$  or  $22.29 h$ ) in corner-point runs. For example, an empirical model that predicts measured concentration of  $P$  at  $t = 4.29 h$  is:

$$y_{mP\ 4.29} = \beta_0 + \beta_1 \frac{KF_0}{SM_0} + \beta_2 \frac{C_{TMA0}}{C_{SM0}} + \beta_3 T + \beta_4 V_s + \varepsilon \quad (S2)$$

The linear regression parameters  $\beta_0, \beta_1, \dots, \beta_4$  in Equation S2 were fitted using data from the 16 corner-point runs. The resulting estimate for parameter  $\beta_1$  was not significantly different from zero at the 95 % confidence level, indicating that the ratio  $\frac{KF_0}{SM_0}$  had negligible influence over the range of conditions encountered in the experiments. Note that estimates for  $\beta_1$  were also not significant in the other 14 empirical models that were fitted. This result makes physical sense because solid  $KF$  was always present in the reactor throughout each run. As a result, the  $KF$  concentration in the reacting mixture depended on  $KF$  solubility rather than the total amount of  $KF$  added in each run. Note that the other parameters in Equation S2 were significantly different from zero, indicating that  $\frac{C_{TMA0}}{C_{SM0}}$ ,  $T$  and  $V_s$  influence the amount of product that is formed after 4.29 hours in the batch reactor.

**Table S1. Target experimental settings for 26 runs used in this study**

| Run # | $T$ (°C) | $C_{TMA0}/C_{SM0}$ | $V_s$ $\left(\frac{L}{kgSM}\right)$ | $KF_0/SM_0$ |
|-------|----------|--------------------|-------------------------------------|-------------|
| 1     | 13       | 0.3                | 12                                  | 7           |
| 2     | 33       | 0.3                | 8                                   | 7           |
| 3     | 13       | 0.7                | 12                                  | 3           |
| 4     | 33       | 0.7                | 8                                   | 3           |
| 5     | 33       | 0.3                | 12                                  | 3           |
| 6     | 13       | 0.3                | 8                                   | 3           |
| 7     | 33       | 0.7                | 12                                  | 7           |

|    |    |     |    |   |
|----|----|-----|----|---|
| 8  | 13 | 0.7 | 8  | 7 |
| 9  | 13 | 0.3 | 12 | 3 |
| 10 | 13 | 0.7 | 12 | 7 |
| 11 | 13 | 0.3 | 8  | 7 |
| 12 | 13 | 0.7 | 8  | 3 |
| 13 | 33 | 0.7 | 8  | 7 |
| 14 | 33 | 0.7 | 12 | 3 |
| 15 | 33 | 0.3 | 12 | 7 |
| 16 | 33 | 0.3 | 8  | 3 |
| 17 | 23 | 0.5 | 10 | 5 |
| 18 | 23 | 0.5 | 10 | 5 |
| 19 | 23 | 0.5 | 10 | 5 |
| 20 | 23 | 0.5 | 10 | 5 |
| 21 | 23 | 0.5 | 10 | 5 |
| 22 | 23 | 0.5 | 10 | 5 |
| 23 | 23 | 0.5 | 10 | 5 |
| 24 | 23 | 0.5 | 10 | 5 |
| 25 | 33 | 0.5 | 10 | 0 |
| 26 | 23 | 0.5 | 10 | 0 |

Using a basis of 1 g of *SM*, the initial concentration of *SM* in each run is:

$$C_{SM0} = \frac{1 [g SM]}{MW_{SM} \left[ \frac{g SM}{mol SM} \right]} \times \frac{1}{V_{rxn} [mL]} \times \frac{1000 mL}{1 L} \quad (S3)$$

where:

$$V_{rxn} = V_s + V_{SM0} \quad (S4)$$

and:

$$V_{SM0} = \frac{1 [g SM]}{\rho_{SM} \left[ \frac{g SM}{mL SM} \right]} \quad (S5)$$

In equation S3,  $MW_{SM} = 273.1 g/mol$  is the molar mass of *SM*,  $V_{rxn}$  is the volume of the reaction mixture,  $V_{SM0}$  is the initial volume of *SM* in the reactor, and  $\rho_{SM} \approx 0.94 g/mL$  is the density of *SM*.

## S2. Unknown parameters and uncertain inputs

Table S2 shows a list of 39 unknown model parameters and 26 uncertain inputs, along with their initial guesses, lower bound (lb) and upper bound (ub). These bounds were selected to ensure that the estimated values for all estimated parameters and inputs are physically realistic.

**Table S2. List of model unknown parameters and uncertain inputs**

| #  | Parameter                                   | Initial Guess | lb   | ub      |
|----|---------------------------------------------|---------------|------|---------|
| 1  | $k_{f1\ ref} \left( \frac{L}{molh} \right)$ | 10000         | 0    | 1000000 |
| 2  | $E_{f1} \left( \frac{kJ}{mol} \right)$      | 50            | 0    | 500     |
| 3  | $K_{1\ ref} \left( \frac{L}{mol} \right)$   | 100           | 0    | 10000   |
| 4  | $\Delta H_1 \left( \frac{kJ}{mol} \right)$  | 0             | -500 | 500     |
| 5  | $k_{f2\ ref} \left( \frac{L}{molh} \right)$ | 10000         | 0    | 1000000 |
| 6  | $E_{f2} \left( \frac{kJ}{mol} \right)$      | 50            | 0    | 500     |
| 7  | $K_{2\ ref}$                                | 100           | 0    | 1000    |
| 8  | $\Delta H_2 \left( \frac{kJ}{mol} \right)$  | 0             | -500 | 500     |
| 9  | $k_{f3\ ref} \left( \frac{1}{h} \right)$    | 2500          | 0    | 25000   |
| 10 | $E_{f3} \left( \frac{kJ}{mol} \right)$      | 50            | 0    | 500     |
| 11 | $K_{3\ ref} \left( \frac{mol}{L} \right)$   | 100           | 0    | 1000    |
| 12 | $\Delta H_3 \left( \frac{kJ}{mol} \right)$  | 0             | -500 | 500     |
| 13 | $k_{f4\ ref} \left( \frac{L}{molh} \right)$ | 5             | 0    | 50      |
| 14 | $E_{f4} \left( \frac{kJ}{mol} \right)$      | 50            | 0    | 500     |
| 15 | $k_{f5\ ref} \left( \frac{L}{molh} \right)$ | 10000         | 0    | 1000000 |
| 16 | $E_{f5} \left( \frac{kJ}{mol} \right)$      | 50            | 0    | 500     |
| 17 | $K_{5\ ref}$                                | 1             | 0    | 10      |

|    |                                               |        |        |         |
|----|-----------------------------------------------|--------|--------|---------|
| 18 | $\Delta H_5 \left( \frac{kJ}{mol} \right)$    | 0      | -500   | 500     |
| 19 | $k_{f6 ref} \left( \frac{1}{h} \right)$       | 2000   | 0      | 20000   |
| 20 | $E_{f6} \left( \frac{kJ}{mol} \right)$        | 50     | 0      | 500     |
| 21 | $k_{fs1 ref} \left( \frac{1}{h} \right)$      | 0.5    | 0      | 5       |
| 22 | $E_{fs1} \left( \frac{kJ}{mol} \right)$       | 50     | 0      | 500     |
| 23 | $k_{fs2 ref} \left( \frac{1}{h} \right)$      | 0.05   | 0      | 0.5     |
| 24 | $E_{fs2} \left( \frac{kJ}{mol} \right)$       | 50     | 0      | 500     |
| 25 | $k_{fs3 ref} \left( \frac{L}{molh} \right)$   | 4000   | 0      | 40000   |
| 26 | $E_{fs3} \left( \frac{kJ}{mol} \right)$       | 50     | 0      | 500     |
| 27 | $K_{s3 ref} \left( \frac{L}{mol} \right)$     | 0.01   | 0      | 1       |
| 28 | $\Delta H_{s3} \left( \frac{kJ}{mol} \right)$ | 0      | -500   | 500     |
| 29 | $k_{fs4 ref} \left( \frac{1}{h} \right)$      | 0.05   | 0      | 0.5     |
| 30 | $E_{fs4} \left( \frac{kJ}{mol} \right)$       | 50     | 0      | 500     |
| 31 | $k_{fs5 ref} \left( \frac{L}{molh} \right)$   | 10000  | 0      | 1000000 |
| 32 | $E_{fs5} \left( \frac{kJ}{mol} \right)$       | 50     | 0      | 500     |
| 33 | $K_{s5 ref}$                                  | 100    | 0      | 1000    |
| 34 | $\Delta H_{s5} \left( \frac{kJ}{mol} \right)$ | 0      | -500   | 500     |
| 35 | $k_{fs6 ref} \left( \frac{1}{h} \right)$      | 0.5    | 0      | 50      |
| 36 | $E_{fs6} \left( \frac{kJ}{mol} \right)$       | 50     | 0      | 500     |
| 37 | $S_{KCl} \left( \frac{mol}{L} \right)$        | 0.004  | 0.002  | 0.006   |
| 38 | $S_{KF} \left( \frac{mol}{L} \right)$         | 0.0003 | 0.0001 | 0.0006  |
| 39 | $k_L a \left( \frac{1}{h} \right)$            | 10000  | 1000   | 100000  |
| 40 | $C_{TMA0,1} \left( \frac{mol}{L} \right)$     | 0.084  | 0.000  | 0.184   |
| 41 | $C_{TMA0,2} \left( \frac{mol}{L} \right)$     | 0.120  | 0.021  | 0.221   |

|    |                                            |       |       |       |
|----|--------------------------------------------|-------|-------|-------|
| 42 | $C_{TMA0,3} \left( \frac{mol}{L} \right)$  | 0.194 | 0.096 | 0.296 |
| 43 | $C_{TMA0,4} \left( \frac{mol}{L} \right)$  | 0.280 | 0.183 | 0.383 |
| 44 | $C_{TMA0,5} \left( \frac{mol}{L} \right)$  | 0.065 | 0.000 | 0.184 |
| 45 | $C_{TMA0,6} \left( \frac{mol}{L} \right)$  | 0.120 | 0.021 | 0.221 |
| 46 | $C_{TMA0,7} \left( \frac{mol}{L} \right)$  | 0.194 | 0.096 | 0.296 |
| 47 | $C_{TMA0,8} \left( \frac{mol}{L} \right)$  | 0.273 | 0.183 | 0.383 |
| 48 | $C_{TMA0,9} \left( \frac{mol}{L} \right)$  | 0.083 | 0.000 | 0.184 |
| 49 | $C_{TMA0,10} \left( \frac{mol}{L} \right)$ | 0.195 | 0.096 | 0.296 |
| 50 | $C_{TMA0,11} \left( \frac{mol}{L} \right)$ | 0.120 | 0.021 | 0.221 |
| 51 | $C_{TMA0,12} \left( \frac{mol}{L} \right)$ | 0.281 | 0.183 | 0.383 |
| 52 | $C_{TMA0,13} \left( \frac{mol}{L} \right)$ | 0.281 | 0.183 | 0.383 |
| 53 | $C_{TMA0,14} \left( \frac{mol}{L} \right)$ | 0.195 | 0.096 | 0.296 |
| 54 | $C_{TMA0,15} \left( \frac{mol}{L} \right)$ | 0.083 | 0.000 | 0.184 |
| 55 | $C_{TMA0,16} \left( \frac{mol}{L} \right)$ | 0.120 | 0.021 | 0.221 |
| 56 | $C_{TMA0,17} \left( \frac{mol}{L} \right)$ | 0.165 | 0.065 | 0.265 |
| 57 | $C_{TMA0,18} \left( \frac{mol}{L} \right)$ | 0.163 | 0.065 | 0.265 |
| 58 | $C_{TMA0,19} \left( \frac{mol}{L} \right)$ | 0.124 | 0.065 | 0.265 |
| 59 | $C_{TMA0,20} \left( \frac{mol}{L} \right)$ | 0.160 | 0.065 | 0.265 |
| 60 | $C_{TMA0,21} \left( \frac{mol}{L} \right)$ | 0.161 | 0.061 | 0.261 |
| 61 | $C_{TMA0,22} \left( \frac{mol}{L} \right)$ | 0.162 | 0.065 | 0.265 |
| 62 | $C_{TMA0,23} \left( \frac{mol}{L} \right)$ | 0.164 | 0.065 | 0.265 |
| 63 | $C_{TMA0,24} \left( \frac{mol}{L} \right)$ | 0.164 | 0.064 | 0.264 |
| 64 | $C_{TMA0,25} \left( \frac{mol}{L} \right)$ | 0.183 | 0.083 | 0.283 |
| 65 | $C_{TMA0,26} \left( \frac{mol}{L} \right)$ | 0.183 | 0.083 | 0.283 |



### S3. Output measurement variance calculations when all inputs are perfectly known

If  $n_q$  replicate runs are available for the  $q^{th}$  set of experimental settings, and each of these replicate runs involves  $n_t$  measurement times where concentrations of  $n_s$  species are obtained.

The measurement variance for the  $k^{th}$  model response can be calculated from: <sup>50</sup>

$$\hat{\sigma}_{Y_{qk}}^2 = \frac{\sum_{j=1}^{n_q} (y_{m,qjk} - \bar{y}_{m,qk})^2}{n_q - 1} \quad (q = 1, \dots, N \text{ and } k = 1, \dots, n_s n_t) \quad (S6)$$

where  $y_{m,qjk}$  is a data value obtained for the  $k^{th}$  model output in the  $j^{th}$  replicate run performed at the  $q^{th}$  set of experimental settings,  $\bar{y}_{m,qk}$  is the average of the measurements for the  $k^{th}$  model output using the measurements from  $n_q$  replicate runs at the  $q^{th}$  set of experimental settings, and  $N$  is the number of target experimental settings. Variances obtained from Equation S7 can be statistically compared using F-tests, and if they are not significantly different, they can be pooled together. <sup>50</sup> For example, variance estimates for the  $k^{th}$  response from all  $N$  sets of run conditions can be pooled using:

$$\hat{\sigma}_{Y_k}^2 = \frac{\sum_{q=1}^N (n_q - 1) \hat{\sigma}_{Y_{qk}}^2}{\sum_{q=1}^N (n_q - 1)} \quad (S7)$$

Note that variance estimates for measurements obtained at different sampling times may also be pooled together if the corresponding estimates are not significantly different. This approach was used to obtain the weighting factors in Equation 4.

Pooled variance estimates obtained from the above procedure were also used to obtain the scaling factors used for parameter subset selection. Because no replicate runs are available for

the last two runs in Table S1, we assumed that variances for  $y_{m\ SM}$  and  $y_{m\ CLDMI}$  in these runs are the same as the estimated variances from the first 24 runs. Unfortunately, there were no measured values for  $C_{QS1Cl}$  in data from the first 24 runs. This concentration was only measured for the last two runs. When estimating parameters, we assumed that the measurement variance of  $y_{m\ QS1Cl}$  is equal to the measurement variance of  $y_{m\ CLDMI}$  in the first 24 runs.

#### S4. Output measurement variance calculations when $C_{TMA0}$ is uncertain

When accounting for uncertainty in the model inputs, output measurement variances need to be calculated while acknowledging that attempted replicate runs are pseudo-replicates that may have different input conditions. Abdi and McAuley proposed the following expression to be used when calculating output measurement variances from pseudo-replicates: <sup>50</sup>

$$\hat{\sigma}_{Y_{qk}}^2 = \max \left( \frac{\sum_{j=1}^{n_q} (y_{m,qjk} - \bar{y}_{m,qk})^2}{n_q - 1} - \left( \frac{\partial g_k}{\partial \mathbf{u}} \Big|_{\mathbf{u}_{mq}, \mathbf{x}_q, \hat{\boldsymbol{\theta}}} \right) \boldsymbol{\Sigma}_U \left( \frac{\partial g_k}{\partial \mathbf{u}} \Big|_{\mathbf{u}_{mq}, \mathbf{x}_q, \hat{\boldsymbol{\theta}}} \right)^T, \delta_k \right) \quad (\text{S8})$$

where  $g$  is a solution to model equations for obtaining the  $k^{th}$  model output,  $\mathbf{u}$  is a vector of uncertain inputs,  $\mathbf{u}_{mq}$  is a vector of measured uncertain inputs at the  $q^{th}$  set of experimental settings,  $\mathbf{x}_q$  is the corresponding vector of perfectly known model inputs,  $\hat{\boldsymbol{\theta}}$  is a vector of parameter estimates,  $\boldsymbol{\Sigma}_U$  is the covariance matrix for the uncertain inputs, and  $\delta_k$  is a cut-off value to make sure that the new calculated variance is not negative. In Equation S8, the contribution of uncertain inputs to the output measurement variances is deducted so that a more accurate estimate of  $\hat{\sigma}_{Y_{qk}}^2$  is computed than would be obtained using Equation S6. After the

estimates of  $\hat{\sigma}_{Y_{qk}}^2$  were computed, pooling of variance estimates was performed to obtain the weighting factors in Equation 5.

## S5. Best and worst fit to data using EVM parameter estimates

Figure S1 shows the model fit to data from run 1. This is the best fit obtained using EVM parameter estimates with a contribution to  $J_{EVM}$  of 13.4 compared to the overall  $J_{EVM}$  of 1552.2. Error bars in Figure S1 correspond to two standard deviations. As expected, EVM and WLS parameter estimates provide similar satisfactory fits to the data for this best case run. Notice that the target value and the estimated value of the initial concentration of *TMA* for run 1 are very close (see Table 10). As a contrast, Figure S2 shows the worst model fit to the data using EVM parameter estimates with a contribution to  $J_{EVM}$  of 275.0. Although EVM provides a better fit to the data for *Int* at lower reaction times for this run (run 12), WLS provides a better fit for *P*. Neither EVM nor WLS parameter estimates provide a good fit to the *FDMI* data in the first half of the batch. Note that the EVM and WLS fits for run 8, which is the pseudo-replicate of run 12, is noticeably better with a contribution to  $J_{EVM}$  of 103.7 suggesting that the data from run 12 may be somewhat problematic. In future, it would be helpful to repeat run 12 to test this hypothesis.

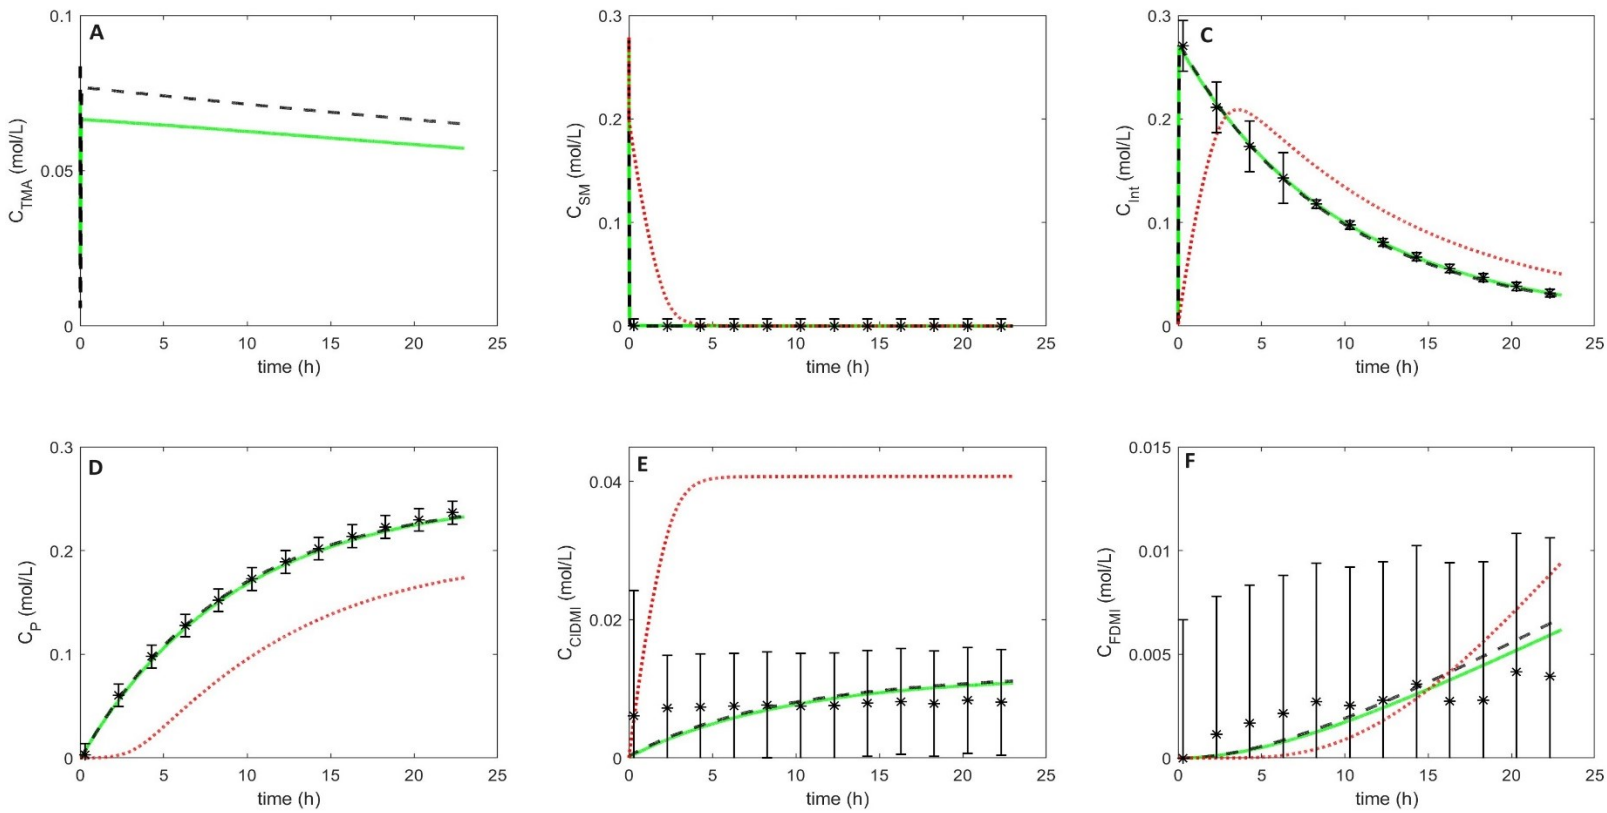

**Figure S1. Comparison of model predictions using initial parameter guesses  $\cdots$ , EVM parameter estimates  $\text{—}$ , and WLS parameter estimates  $\text{---}$  with experimental data  $*$  for TMA, SM, Int, P, CIDMI, and FDMI from run 1**

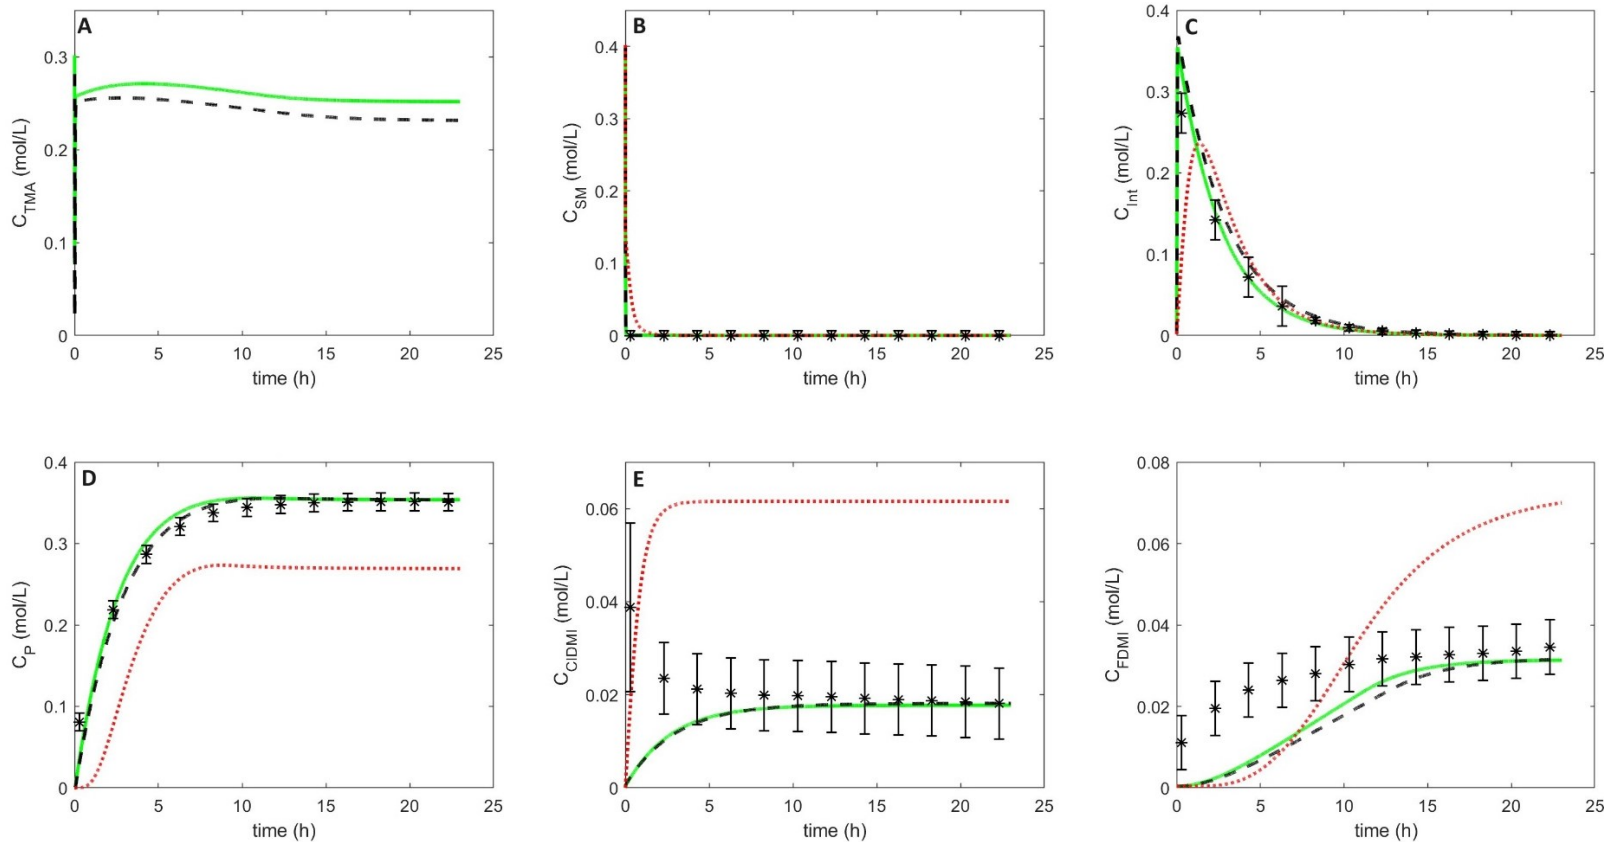

**Figure S2. Comparison of model predictions using initial parameter guesses  $\cdots$ , EVM parameter estimates  $\text{—}$ , and WLS parameter estimates  $\text{---}$  with experimental data  $*$  for TMA, SM, Int, P, CIDMI, and FDMI from run 12**

## S6. Variance-covariance Matrices for the Parameter Estimates

Tables S3 and S4 show a portion of the variance-covariance matrices corresponding to WLS and EVM parameter estimates, respectively. In these tables, only strong correlation coefficients (greater than 0.8 or less than -0.8) are shown for simplicity. It is interesting that the number of large-magnitude covariances arising from EVM is smaller (i.e., 20) than the number arising from WLS (i.e., 23).

Table S3. Elements of variance-covariance matrix for WLS parameter estimates that indicate high correlation

|                 | $k_{f2ref}$ | $K_{s3ref}$ | $\Delta H_1$ | $E_{f5}$ | $k_L a$ | $\Delta H_{s5}$ | $S_{KCl}$ | $\Delta H_3$ | $K_{3ref}$ | $\Delta H_2$ | $k_{fs2ref}$ | $k_{f6ref}$ | $k_{fs5ref}$ | $K_{s5ref}$ | $S_{KF}$ | $k_{fs4ref}$ | $K_{5ref}$ | $E_{fs2}$ |
|-----------------|-------------|-------------|--------------|----------|---------|-----------------|-----------|--------------|------------|--------------|--------------|-------------|--------------|-------------|----------|--------------|------------|-----------|
| $k_{f2ref}$     | 1           | -           | -            | -        | 0.99    | -               | -         | -            | -          | -            | -            | -           | -            | -           | -0.99    | -            | -          | -         |
| $K_{s3ref}$     | -           | 1           | -            | -        | -       | -               | -         | -            | -          | -            | -            | -           | -0.92        | -           | -        | -            | -          | -         |
| $\Delta H_1$    | -           | -           | 1            | -        | -       | -               | -         | 0.91         | -0.91      | 0.90         | 0.90         | -           | -            | -           | -        | -            | -          | 0.91      |
| $E_{f5}$        | -           | -           | -            | 1        | -       | -               | -         | -            | -          | -            | -            | -           | -            | -           | -        | -            | -0.87      | -         |
| $k_L a$         | 0.99        | -           | -            | -        | 1       | -               | -         | -            | -          | -            | -            | -           | -            | -           | -0.99    | -            | -          | -         |
| $\Delta H_{s5}$ | -           | -           | -            | -        | -       | 1               | -         | -            | -          | -            | -            | -           | -            | -0.81       | -        | -            | -          | -         |
| $S_{KCl}$       | -           | -           | -            | -        | -       | -               | 1         | -            | -          | -            | -            | -           | -            | -           | -        | -0.8         | -          | -         |
| $\Delta H_3$    | -           | -           | 0.91         | -        | -       | -               | -         | 1            | -0.98      | 0.97         | 0.97         | -           | -            | -           | -        | -            | -          | 0.99      |
| $K_{3ref}$      | -           | -           | -0.91        | -        | -       | -               | -         | -0.98        | 1          | -0.99        | -0.97        | -           | -            | -           | -        | -            | -          | -0.99     |
| $\Delta H_2$    | -           | -           | 0.90         | -        | -       | -               | -         | 0.97         | -0.99      | 1            | 0.99         | -           | -            | -           | -        | -            | -          | 0.99      |
| $k_{fs2ref}$    | -           | -           | 0.90         | -        | -       | -               | -         | 0.97         | -0.97      | 0.99         | 1            | -           | -            | -           | -        | -            | -          | 0.99      |
| $k_{f6ref}$     | -           | -           | -            | -        | -       | -               | -         | -            | -          | -            | -            | 1           | -            | -           | -        | -            | -0.86      | -         |
| $k_{fs5ref}$    | -           | -0.92       | -            | -        | -       | -               | -         | -            | -          | -            | -            | -           | 1            | -           | -        | -            | -          | -         |
| $K_{s5ref}$     | -           | -           | -            | -        | -       | -0.81           | -         | -            | -          | -            | -            | -           | -            | 1           | -        | -            | -          | -         |
| $S_{KF}$        | -0.99       | -           | -            | -        | -0.99   | -               | -         | -            | -          | -            | -            | -           | -            | -           | 1        | -            | -          | -         |
| $k_{fs4ref}$    | -           | -           | -            | -        | -       | -               | -0.8      | -            | -          | -            | -            | -           | -            | -           | -        | 1            | -          | -         |
| $K_{5ref}$      | -           | -           | -            | -0.87    | -       | -               | -         | -            | -          | -            | -            | -0.86       | -            | -           | -        | -            | 1          | -         |
| $E_{fs2}$       | -           | -           | 0.91         | -        | -       | -               | -         | 0.99         | -0.99      | 0.99         | 0.99         | -           | -            | -           | -        | -            | -          | 1         |

Table S4. Elements of variance-covariance matrix for EVM parameter estimates that indicate high correlation

|                | $k_{f2\ ref}$ | $E_{f2}$ | $C_{TMA0,11}$ | $C_{TMA0,6}$ | $\Delta H_1$ | $C_{TMA0,1}$ | $C_{TMA0,9}$ | $k_L a$ | $S_{KCl}$ | $K_{s5\ ref}$ | $k_{fs4\ ref}$ | $K_{3\ ref}$ | $\Delta H_2$ | $E_{fs4}$ | $k_{fs2\ ref}$ | $S_{KF}$ | $E_{f1}$ | $k_{f3\ ref}$ |
|----------------|---------------|----------|---------------|--------------|--------------|--------------|--------------|---------|-----------|---------------|----------------|--------------|--------------|-----------|----------------|----------|----------|---------------|
| $k_{f2\ ref}$  | 1             | -        | -             | -            | -            | -            | -            | 0.99    | -         | -0.82         | -              | -            | -            | -         | -              | -0.99    | -        | -             |
| $E_{f2}$       | -             | 1        | -             | -            | -            | -            | -            | -       | -         | -             | -              | -            | -            | -         | -              | -        | 0.88     | 0.84          |
| $C_{TMA0,11}$  | -             | -        | 1             | 0.92         | -            | 0.89         | 0.89         | -       | -         | -             | -              | -            | -            | -         | -              | -        | -        | -             |
| $C_{TMA0,6}$   | -             | -        | 0.92          | 1            | -            | 0.89         | 0.89         | -       | -         | -             | -              | -            | -            | -         | -              | -        | -        | -             |
| $\Delta H_1$   | -             | -        | -             | -            | 1            | -            | -            | -       | -         | -             | -              | -0.91        | -            | -         | -              | -        | -        | -             |
| $C_{TMA0,1}$   | -             | -        | 0.89          | 0.89         | -            | 1            | 0.91         | -       | -         | -             | -              | -            | -            | -         | -              | -        | -        | -             |
| $C_{TMA0,9}$   | -             | -        | 0.89          | 0.89         | -            | 0.91         | 1            | -       | -         | -             | -              | -            | -            | -         | -              | -        | -        | -             |
| $k_L a$        | 0.99          | -        | -             | -            | -            | -            | -            | 1       | -         | -0.82         | -              | -            | -            | -         | -              | -0.99    | -        | -             |
| $S_{KCl}$      | -             | -        | -             | -            | -            | -            | -            | -       | 1         | -             | -0.84          | -            | -            | -         | -              | -        | -        | -             |
| $K_{s5\ ref}$  | -0.82         | -        | -             | -            | -            | -            | -            | -0.82   | -         | 1             | -              | -            | -            | -         | -              | 0.82     | -        | -             |
| $k_{fs4\ ref}$ | -             | -        | -             | -            | -            | -            | -            | -       | -0.84     | -             | 1              | -            | -            | -0.92     | -              | -        | -        | -             |
| $K_{3\ ref}$   | -             | -        | -             | -            | -0.91        | -            | -            | -       | -         | -             | -              | 1            | -0.87        | -         | -0.84          | -        | -        | -             |
| $\Delta H_2$   | -             | -        | -             | -            | -            | -            | -            | -       | -         | -             | -              | -0.87        | 1            | -         | 0.89           | -        | -        | -             |
| $E_{fs4}$      | -             | -        | -             | -            | -            | -            | -            | -       | -         | -             | -0.92          | -            | -            | 1         | -              | -        | -        | -             |
| $k_{fs2\ ref}$ | -             | -        | -             | -            | -            | -            | -            | -       | -         | -             | -              | -0.84        | 0.89         | -         | 1              | -        | -        | -             |
| $S_{KF}$       | -0.99         | -        | -             | -            | -            | -            | -            | -0.99   | -         | 0.82          | -              | -            | -            | -         | -              | 1        | -        | -             |
| $E_{f1}$       | -             | 0.88     | -             | -            | -            | -            | -            | -       | -         | -             | -              | -            | -            | -         | -              | -        | 1        | -             |
| $k_{f3\ ref}$  | -             | 0.84     | -             | -            | -            | -            | -            | -       | -         | -             | -              | -            | -            | -         | -              | -        | -        | 1             |

## S7. Cross Validation Results

Figure S3 shows model predictions using EVM and WLS estimates for run 16 when parameters are estimated using data from the other runs. The predictions for  $C_{CIDMI}$  are noticeably better using the EVM parameter estimates. Predictions of other types of data are similar for this run.

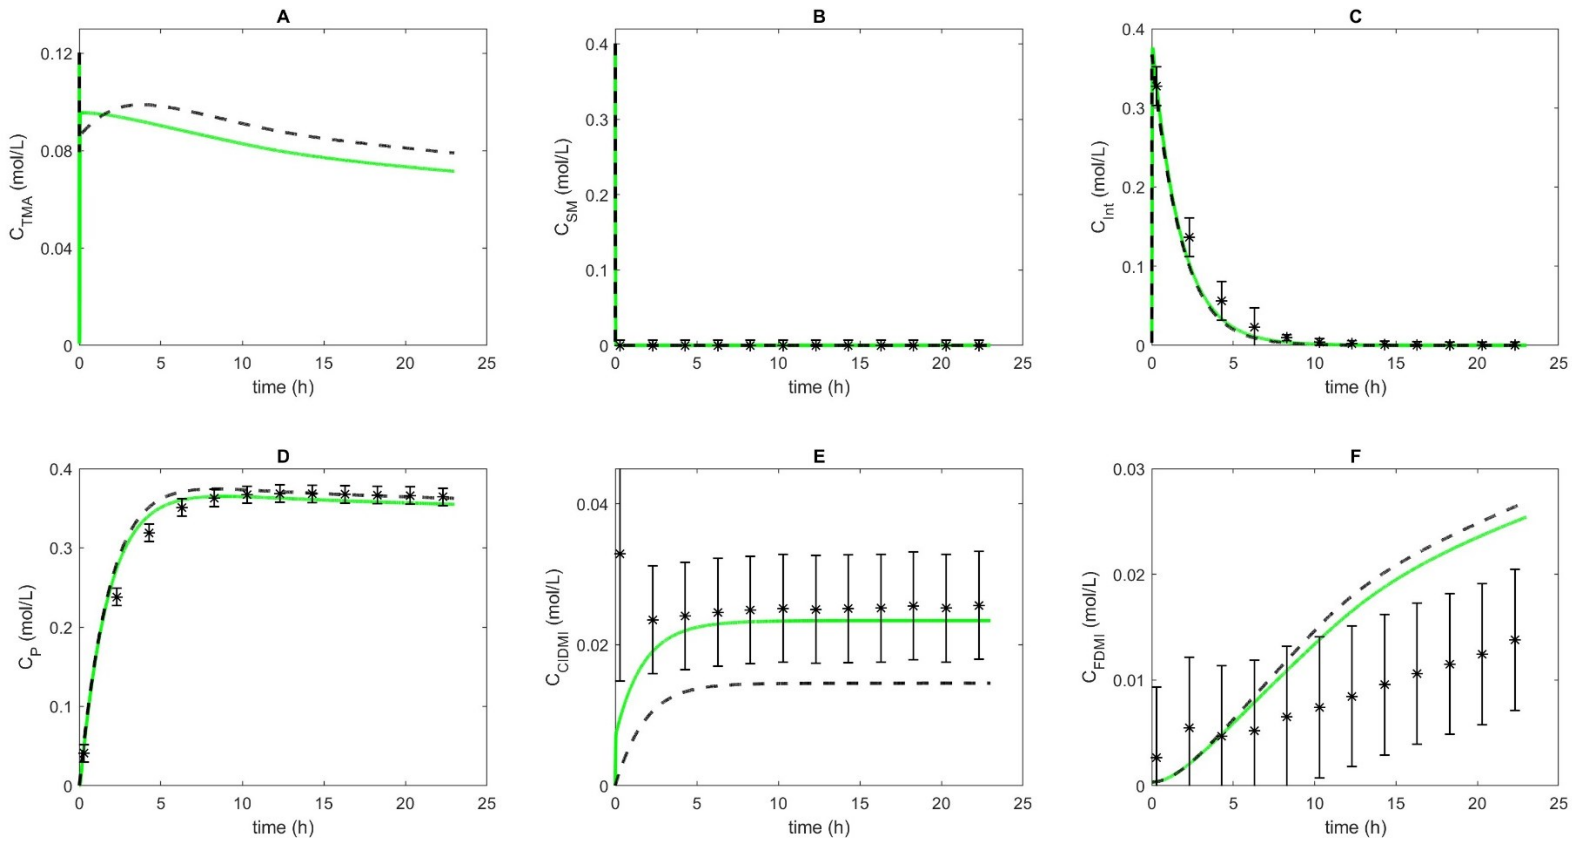

**Figure S3. Comparison of model predictions using EVM parameter estimates — and WLS parameter estimates ---- with experimental data \* for TMA, SM, Int, P, CIDMI, and FDMI from run 16**



## S8. Optimization Results from Model using WLS Estimates

Table S5 shows results for the optimization problem when the model uses WLS parameter estimates. Optimization results are similar for both EVM and WLS case. However, compared to results from EVM estimates, model that uses WLS is less sensitive to changes in the reaction time and solvent volume.

**Table S5. Results of solving the yield optimization problem using WLS estimates for model parameters**

| Case #   | Decision Variables |                            |           |                 | Responses of Interest |                                                      |
|----------|--------------------|----------------------------|-----------|-----------------|-----------------------|------------------------------------------------------|
|          | $T$ (°C)           | $\frac{C_{TMAO}}{C_{SMO}}$ | $t_f$ (h) | $V_s$ (mL/g SM) | Optimized Yield       | Quality Constraint<br>$\frac{C_{Int}(t_f)}{C_{SMO}}$ |
| <b>1</b> | 29.00              | 0.1320                     | 48        | 12              | 0.9226                | 0.0065                                               |
| <b>2</b> | 28.77              | 0.2163                     | 24        | 12              | 0.9216                | 0.0066                                               |
| <b>3</b> | 28.85              | 0.1098                     | 48        | 8               | 0.9231                | 0.0066                                               |
| <b>4</b> | 28.61              | 0.1694                     | 24        | 8               | 0.9210                | 0.0068                                               |

## S9. Additional yield contours

Figure S4 shows four yield contours for Case 1 in Table 12. Error bars in this figure correspond to the uncertainties in  $T$  and  $\frac{C_{SMO}}{C_{TMAO}}$ . Similarly, Figure S5 shows yield contours corresponding to Case 4. Contours shown in Figures S4 and S5 confirm that the maximum yield is not very sensitive to the anticipated variability in the decision variables during commercial operation.

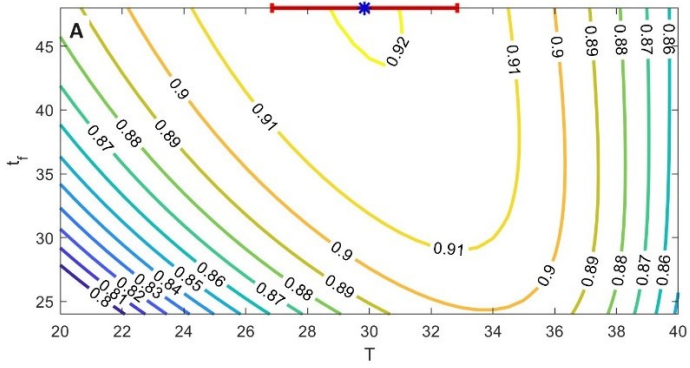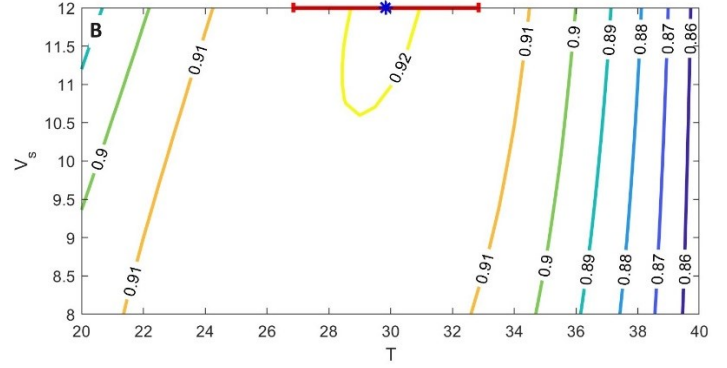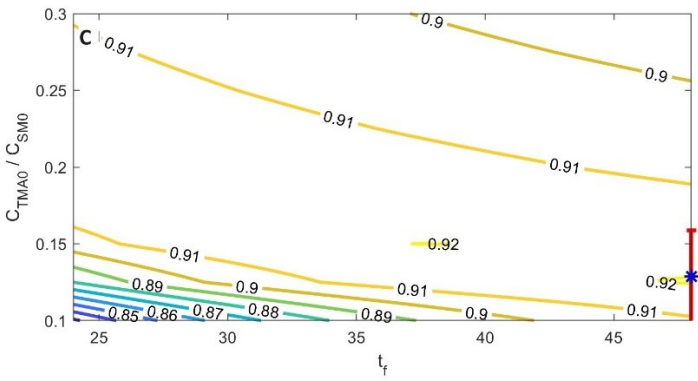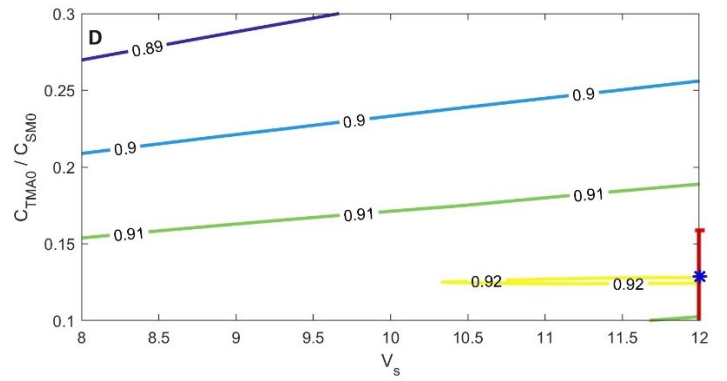

Figure S4. Yield contours for Case 1 in Table 12. \* shows the optimization result for Case 1

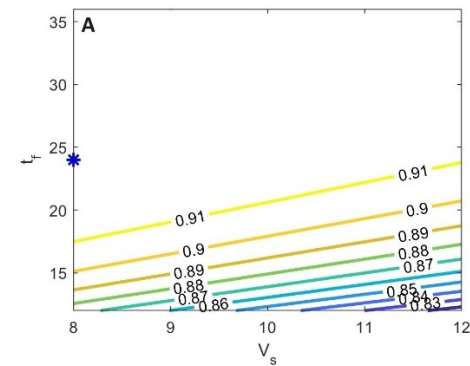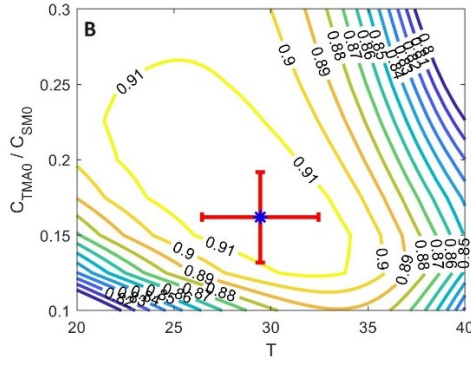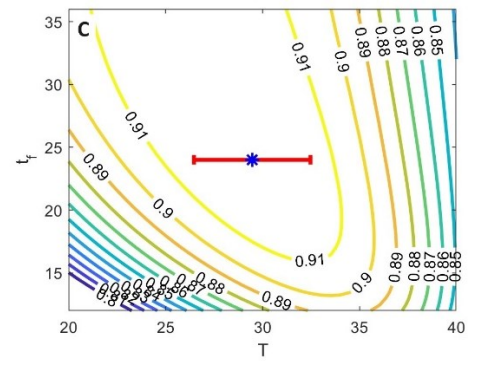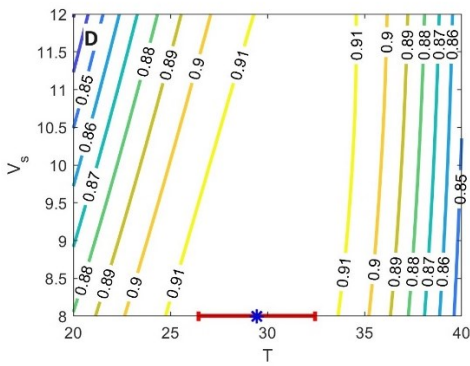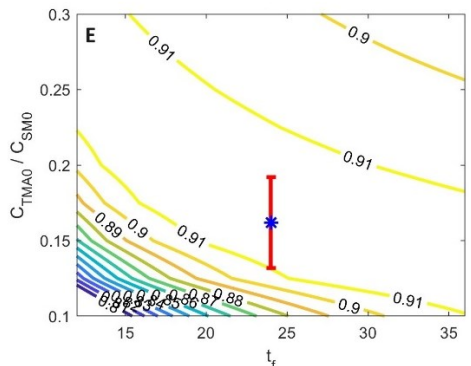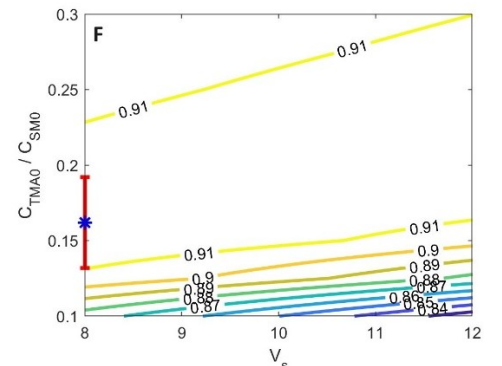

Figure S5. Yield contours for Case 4 in Table 12. \* shows the optimization result for Case 4

## S10. Numerical settings

Table S6 provides details of the solvers and numerical settings used for solving the model equations and for conducting parameter estimation and process optimization. To investigate the possibility of local minima, the parameter estimation and optimization problems were solved multiple times using different sets of initial guesses. No convergence to local minima was observed.

**Table S6. details of solvers and numerical settings used in this study**

| For model equations      |                                   |
|--------------------------|-----------------------------------|
| Solver                   | <i>ode15s</i>                     |
| RelTol                   | $10^{-10}$                        |
| AbsTol                   | $10^{-10}$                        |
| For parameter estimation |                                   |
| Solver                   | <i>lsqnonlin</i>                  |
| Algorithm                | trust-region-reflective (default) |
| OptimalityTolerance      | $10^{-7}$                         |
| StepTolerance            | $10^{-7}$                         |
| FunctionTolerance        | $10^{-7}$                         |
| For yield optimization   |                                   |
| Solver                   | <i>fmincon</i>                    |
| Algorithm                | sqp                               |
| ToIX                     | $10^{-20}$                        |
| ToIFun                   | $10^{-20}$                        |
| ConstraintTolerance      | $10^{-20}$                        |

## S11. Experimental data

Tables S7 to S32 provide experimental data from run 1 to run 26, respectively.

**Table S7. Measured data corresponding to run 1**

|                     |        |        |        |        |        |        |         |         |         |         |         |         |         |
|---------------------|--------|--------|--------|--------|--------|--------|---------|---------|---------|---------|---------|---------|---------|
| time(h)             | 0      | 0.2917 | 2.2917 | 4.2917 | 6.2917 | 8.2917 | 10.2917 | 12.2917 | 14.2917 | 16.2917 | 18.2917 | 20.2917 | 22.2917 |
| $C_{SM}$ (mol/L)    | 0.2787 | 0.0004 | 0.0000 | 0.0000 | 0.0000 | 0.0000 | 0.0000  | 0.0000  | 0.0000  | 0.0000  | 0.0000  | 0.0000  | 0.0000  |
| $C_{Int}$ (mol/L)   | 0.0016 | 0.2707 | 0.2114 | 0.1734 | 0.1429 | 0.1178 | 0.0977  | 0.0808  | 0.0668  | 0.0555  | 0.0467  | 0.0382  | 0.0318  |
| $C_P$ (mol/L)       | 0.0000 | 0.0031 | 0.0605 | 0.0979 | 0.1277 | 0.1521 | 0.1726  | 0.1891  | 0.2020  | 0.2139  | 0.2229  | 0.2296  | 0.2365  |
| $C_{CIDMI}$ (mol/L) | 0.0000 | 0.0061 | 0.0072 | 0.0074 | 0.0075 | 0.0077 | 0.0075  | 0.0076  | 0.0079  | 0.0082  | 0.0079  | 0.0083  | 0.0080  |
| $C_{FDMI}$ (mol/L)  | 0.0000 | 0.0000 | 0.0011 | 0.0017 | 0.0021 | 0.0027 | 0.0025  | 0.0028  | 0.0036  | 0.0027  | 0.0028  | 0.0042  | 0.0039  |

**Table S8. Measured data corresponding to run 2**

|                     |        |        |        |        |        |        |         |         |         |         |         |         |         |
|---------------------|--------|--------|--------|--------|--------|--------|---------|---------|---------|---------|---------|---------|---------|
| time(h)             | 0      | 0.2917 | 2.2917 | 4.2917 | 6.2917 | 8.2917 | 10.2917 | 12.2917 | 14.2917 | 16.2917 | 18.2917 | 20.2917 | 22.2917 |
| $C_{SM}$ (mol/L)    | 0.3992 | 0.0000 | 0.0000 | 0.0000 | 0.0000 | 0.0000 | 0.0000  | 0.0000  | 0.0000  | 0.0000  | 0.0000  | 0.0000  | 0.0000  |
| $C_{Int}$ (mol/L)   | 0.0045 | 0.3563 | 0.1507 | 0.0662 | 0.0293 | 0.0131 | 0.0061  | 0.0030  | 0.0015  | 0.0009  | 0.0005  | 0.0004  | 0.0003  |
| $C_P$ (mol/L)       | 0.0000 | 0.0317 | 0.2296 | 0.3134 | 0.3496 | 0.3644 | 0.3703  | 0.3724  | 0.3729  | 0.3722  | 0.3724  | 0.3712  | 0.3706  |
| $C_{CIDMI}$ (mol/L) | 0.0000 | 0.0156 | 0.0198 | 0.0203 | 0.0207 | 0.0210 | 0.0211  | 0.0212  | 0.0212  | 0.0216  | 0.0213  | 0.0214  | 0.0214  |
| $C_{FDMI}$ (mol/L)  | 0.0003 | 0.0004 | 0.0040 | 0.0041 | 0.0044 | 0.0054 | 0.0065  | 0.0075  | 0.0084  | 0.0093  | 0.0098  | 0.0110  | 0.0118  |

**Table S9. Measured data corresponding to run 3**

|                     |        |        |        |        |        |        |         |         |         |         |         |         |         |
|---------------------|--------|--------|--------|--------|--------|--------|---------|---------|---------|---------|---------|---------|---------|
| time(h)             | 0      | 0.2917 | 2.2917 | 4.2917 | 6.2917 | 8.2917 | 10.2917 | 12.2917 | 14.2917 | 16.2917 | 18.2917 | 20.2917 | 22.2917 |
| $C_{SM}$ (mol/L)    | 0.2768 | 0.0000 | 0.0000 | 0.0000 | 0.0000 | 0.0000 | 0.0000  | 0.0000  | 0.0000  | 0.0000  | 0.0000  | 0.0000  | 0.0000  |
| $C_{Int}$ (mol/L)   | 0.0026 | 0.2363 | 0.1406 | 0.0903 | 0.0578 | 0.0370 | 0.0237  | 0.0153  | 0.0098  | 0.0064  | 0.0044  | 0.0028  | 0.0018  |
| $C_P$ (mol/L)       | 0.0009 | 0.0295 | 0.1216 | 0.1716 | 0.2035 | 0.2240 | 0.2370  | 0.2451  | 0.2503  | 0.2530  | 0.2545  | 0.2533  | 0.2538  |
| $C_{CIDMI}$ (mol/L) | 0.0000 | 0.0142 | 0.0131 | 0.0125 | 0.0123 | 0.0123 | 0.0123  | 0.0123  | 0.0122  | 0.0122  | 0.0122  | 0.0125  | 0.0125  |
| $C_{FDMI}$ (mol/L)  | 0.0000 | 0.0003 | 0.0050 | 0.0059 | 0.0067 | 0.0070 | 0.0073  | 0.0077  | 0.0080  | 0.0086  | 0.0092  | 0.0117  | 0.0121  |

**Table S10. Measured data corresponding to run 4**

|                     |        |        |        |        |        |        |         |         |         |         |         |         |         |
|---------------------|--------|--------|--------|--------|--------|--------|---------|---------|---------|---------|---------|---------|---------|
| time(h)             | 0      | 0.2917 | 2.2917 | 4.2917 | 6.2917 | 8.2917 | 10.2917 | 12.2917 | 14.2917 | 16.2917 | 18.2917 | 20.2917 | 22.2917 |
| $C_{SM}$ (mol/L)    | 0.3997 | 0.0000 | 0.0000 | 0.0000 | 0.0000 | 0.0000 | 0.0000  | 0.0000  | 0.0000  | 0.0000  | 0.0000  | 0.0000  | 0.0000  |
| $C_{Int}$ (mol/L)   | 0.0031 | 0.2794 | 0.0327 | 0.0043 | 0.0008 | 0.0003 | 0.0003  | 0.0002  | 0.0002  | 0.0002  | 0.0000  | 0.0000  | 0.0000  |
| $C_P$ (mol/L)       | 0.0012 | 0.0851 | 0.3180 | 0.3447 | 0.3466 | 0.3448 | 0.3427  | 0.3409  | 0.3382  | 0.3363  | 0.3346  | 0.3307  | 0.3274  |
| $C_{CIDMI}$ (mol/L) | 0.0000 | 0.0354 | 0.0379 | 0.0375 | 0.0371 | 0.0368 | 0.0365  | 0.0362  | 0.0359  | 0.0357  | 0.0359  | 0.0358  | 0.0362  |
| $C_{FDMI}$ (mol/L)  | 0.0000 | 0.0041 | 0.0154 | 0.0174 | 0.0195 | 0.0221 | 0.0245  | 0.0267  | 0.0296  | 0.0318  | 0.0335  | 0.0375  | 0.0404  |

**Table S11. Measured data corresponding to run 5**

|                     |        |        |        |        |        |        |         |         |         |         |         |         |         |
|---------------------|--------|--------|--------|--------|--------|--------|---------|---------|---------|---------|---------|---------|---------|
| time(h)             | 0      | 0.2917 | 2.2917 | 4.2917 | 6.2917 | 8.2917 | 10.2917 | 12.2917 | 14.2917 | 16.2917 | 18.2917 | 20.2917 | 22.2917 |
| $C_{SM}$ (mol/L)    | 0.2154 | 0.0000 | 0.0000 | 0.0000 | 0.0000 | 0.0000 | 0.0000  | 0.0000  | 0.0000  | 0.0000  | 0.0000  | 0.0000  | 0.0000  |
| $C_{Int}$ (mol/L)   | 0.0628 | 0.2354 | 0.1110 | 0.0521 | 0.0245 | 0.0117 | 0.0057  | 0.0029  | 0.0015  | 0.0008  | 0.0004  | 0.0003  | 0.0000  |
| $C_P$ (mol/L)       | 0.0009 | 0.0313 | 0.1547 | 0.2124 | 0.2391 | 0.2509 | 0.2562  | 0.2586  | 0.2595  | 0.2603  | 0.2607  | 0.2598  | 0.2597  |
| $C_{CIDMI}$ (mol/L) | 0.0011 | 0.0126 | 0.0114 | 0.0116 | 0.0118 | 0.0118 | 0.0119  | 0.0121  | 0.0121  | 0.0121  | 0.0121  | 0.0121  | 0.0122  |
| $C_{FDMI}$ (mol/L)  | 0.0000 | 0.0010 | 0.0032 | 0.0043 | 0.0049 | 0.0059 | 0.0065  | 0.0067  | 0.0071  | 0.0070  | 0.0071  | 0.0081  | 0.0084  |

**Table S12. Measured data corresponding to run 6**

|                     |        |        |        |        |        |        |         |         |         |         |         |         |         |
|---------------------|--------|--------|--------|--------|--------|--------|---------|---------|---------|---------|---------|---------|---------|
| time(h)             | 0      | 0.2917 | 2.2917 | 4.2917 | 6.2917 | 8.2917 | 10.2917 | 12.2917 | 14.2917 | 16.2917 | 18.2917 | 20.2917 | 22.2917 |
| $C_{SM}$ (mol/L)    | 0.3984 | 0.0930 | 0.0002 | 0.0000 | 0.0000 | 0.0000 | 0.0000  | 0.0000  | 0.0000  | 0.0000  | 0.0000  | 0.0000  | 0.0000  |
| $C_{Int}$ (mol/L)   | 0.0040 | 0.2607 | 0.2713 | 0.2095 | 0.1624 | 0.1267 | 0.0981  | 0.0767  | 0.0600  | 0.0468  | 0.0362  | 0.0280  | 0.0220  |
| $C_P$ (mol/L)       | 0.0013 | 0.0015 | 0.1138 | 0.1752 | 0.2206 | 0.2564 | 0.2839  | 0.3052  | 0.3220  | 0.3349  | 0.3450  | 0.3516  | 0.3588  |
| $C_{CIDMI}$ (mol/L) | 0.0000 | 0.0488 | 0.0152 | 0.0145 | 0.0148 | 0.0146 | 0.0149  | 0.0149  | 0.0149  | 0.0151  | 0.0150  | 0.0154  | 0.0149  |
| $C_{FDMI}$ (mol/L)  | 0.0003 | 0.0000 | 0.0035 | 0.0048 | 0.0061 | 0.0063 | 0.0070  | 0.0072  | 0.0071  | 0.0071  | 0.0078  | 0.0089  | 0.0083  |

**Table S13. Measured data corresponding to run 7**

|                     |        |        |        |        |        |        |         |         |         |         |         |         |         |
|---------------------|--------|--------|--------|--------|--------|--------|---------|---------|---------|---------|---------|---------|---------|
| time(h)             | 0      | 0.2917 | 2.2917 | 4.2917 | 6.2917 | 8.2917 | 10.2917 | 12.2917 | 14.2917 | 16.2917 | 18.2917 | 20.2917 | 22.2917 |
| $C_{SM}$ (mol/L)    | 0.2772 | 0.0002 | 0.0000 | 0.0000 | 0.0000 | 0.0000 | 0.0000  | 0.0000  | 0.0000  | 0.0000  | 0.0000  | 0.0000  | 0.0000  |
| $C_{Int}$ (mol/L)   | 0.0023 | 0.1948 | 0.0315 | 0.0053 | 0.0012 | 0.0004 | 0.0003  | 0.0002  | 0.0002  | 0.0002  | 0.0000  | 0.0000  | 0.0000  |
| $C_P$ (mol/L)       | 0.0008 | 0.0591 | 0.2239 | 0.2487 | 0.2496 | 0.2507 | 0.2487  | 0.2464  | 0.2472  | 0.2450  | 0.2441  | 0.2425  | 0.2410  |
| $C_{CIDMI}$ (mol/L) | 0.0000 | 0.0215 | 0.0157 | 0.0154 | 0.0154 | 0.0152 | 0.0151  | 0.0152  | 0.0149  | 0.0149  | 0.0148  | 0.0148  | 0.0148  |
| $C_{FDMI}$ (mol/L)  | 0.0000 | 0.0047 | 0.0091 | 0.0109 | 0.0141 | 0.0139 | 0.0162  | 0.0184  | 0.0180  | 0.0202  | 0.0214  | 0.0230  | 0.0245  |

**Table S14. Measured data corresponding to run 8**

|                     |        |        |        |        |        |        |         |         |         |         |         |         |         |
|---------------------|--------|--------|--------|--------|--------|--------|---------|---------|---------|---------|---------|---------|---------|
| time(h)             | 0      | 0.2917 | 2.2917 | 4.2917 | 6.2917 | 8.2917 | 10.2917 | 12.2917 | 14.2917 | 16.2917 | 18.2917 | 20.2917 | 22.2917 |
| $C_{SM}$ (mol/L)    | 0.3903 | 0.0000 | 0.0000 | 0.0000 | 0.0000 | 0.0000 | 0.0000  | 0.0000  | 0.0000  | 0.0000  | 0.0000  | 0.0000  | 0.0000  |
| $C_{Int}$ (mol/L)   | 0.0118 | 0.3017 | 0.1500 | 0.0752 | 0.0378 | 0.0191 | 0.0098  | 0.0052  | 0.0028  | 0.0016  | 0.0009  | 0.0006  | 0.0004  |
| $C_P$ (mol/L)       | 0.0015 | 0.0704 | 0.2216 | 0.2943 | 0.3315 | 0.3476 | 0.3556  | 0.3591  | 0.3593  | 0.3598  | 0.3594  | 0.3554  | 0.3536  |
| $C_{CIDMI}$ (mol/L) | 0.0002 | 0.0258 | 0.0190 | 0.0181 | 0.0175 | 0.0176 | 0.0173  | 0.0170  | 0.0170  | 0.0169  | 0.0165  | 0.0167  | 0.0166  |
| $C_{FDMI}$ (mol/L)  | 0.0002 | 0.0061 | 0.0133 | 0.0163 | 0.0172 | 0.0197 | 0.0213  | 0.0226  | 0.0249  | 0.0257  | 0.0272  | 0.0313  | 0.0334  |

**Table S15. Measured data corresponding to run 9**

|                     |        |        |        |        |        |        |         |         |         |         |         |         |         |
|---------------------|--------|--------|--------|--------|--------|--------|---------|---------|---------|---------|---------|---------|---------|
| time(h)             | 0      | 0.2917 | 2.2917 | 4.2917 | 6.2917 | 8.2917 | 10.2917 | 12.2917 | 14.2917 | 16.2917 | 18.2917 | 20.2917 | 22.2917 |
| $C_{SM}$ (mol/L)    | 0.2773 | 0.0003 | 0.0000 | 0.0003 | 0.0000 | 0.0000 | 0.0000  | 0.0000  | 0.0000  | 0.0000  | 0.0000  | 0.0000  | 0.0000  |
| $C_{Int}$ (mol/L)   | 0.0028 | 0.2560 | 0.2094 | 0.1718 | 0.1395 | 0.1149 | 0.0946  | 0.0782  | 0.0645  | 0.0534  | 0.0442  | 0.0368  | 0.0305  |
| $C_P$ (mol/L)       | 0.0000 | 0.0110 | 0.0615 | 0.0991 | 0.1306 | 0.1548 | 0.1749  | 0.1914  | 0.2047  | 0.2156  | 0.2245  | 0.2322  | 0.2379  |
| $C_{CIDMI}$ (mol/L) | 0.0000 | 0.0127 | 0.0080 | 0.0075 | 0.0078 | 0.0079 | 0.0079  | 0.0079  | 0.0079  | 0.0080  | 0.0081  | 0.0081  | 0.0082  |
| $C_{FDMI}$ (mol/L)  | 0.0002 | 0.0003 | 0.0013 | 0.0016 | 0.0024 | 0.0028 | 0.0029  | 0.0029  | 0.0031  | 0.0032  | 0.0034  | 0.0031  | 0.0037  |

**Table S16. Measured data corresponding to run 10**

|                     |        |        |        |        |        |        |         |         |         |         |         |         |         |
|---------------------|--------|--------|--------|--------|--------|--------|---------|---------|---------|---------|---------|---------|---------|
| time(h)             | 0      | 0.2917 | 2.2917 | 4.2917 | 6.2917 | 8.2917 | 10.2917 | 12.2917 | 14.2917 | 16.2917 | 18.2917 | 20.2917 | 22.2917 |
| $C_{SM}$ (mol/L)    | 0.2785 | 0.0036 | 0.0000 | 0.0000 | 0.0000 | 0.0000 | 0.0000  | 0.0000  | 0.0000  | 0.0000  | 0.0000  | 0.0000  | 0.0000  |
| $C_{Int}$ (mol/L)   | 0.0018 | 0.2089 | 0.1263 | 0.0736 | 0.0433 | 0.0255 | 0.0150  | 0.0089  | 0.0054  | 0.0033  | 0.0021  | 0.0014  | 0.0009  |
| $C_P$ (mol/L)       | 0.0000 | 0.0434 | 0.1327 | 0.1857 | 0.2168 | 0.2347 | 0.2448  | 0.2495  | 0.2527  | 0.2541  | 0.2553  | 0.2545  | 0.2541  |
| $C_{CIDMI}$ (mol/L) | 0.0000 | 0.0203 | 0.0120 | 0.0102 | 0.0094 | 0.0091 | 0.0091  | 0.0091  | 0.0091  | 0.0091  | 0.0090  | 0.0090  | 0.0090  |
| $C_{FDMI}$ (mol/L)  | 0.0000 | 0.0040 | 0.0092 | 0.0108 | 0.0108 | 0.0109 | 0.0114  | 0.0127  | 0.0131  | 0.0138  | 0.0138  | 0.0154  | 0.0162  |

**Table S17. Measured data corresponding to run 11**

|                     |        |        |        |        |        |        |         |         |         |         |         |         |         |
|---------------------|--------|--------|--------|--------|--------|--------|---------|---------|---------|---------|---------|---------|---------|
| time(h)             | 0      | 0.2917 | 2.2917 | 4.2917 | 6.2917 | 8.2917 | 10.2917 | 12.2917 | 14.2917 | 16.2917 | 18.2917 | 20.2917 | 22.2917 |
| $C_{SM}$ (mol/L)    | 0.4006 | 0.0000 | 0.0000 | 0.0000 | 0.0000 | 0.0000 | 0.0000  | 0.0000  | 0.0000  | 0.0000  | 0.0000  | 0.0000  | 0.0000  |
| $C_{Int}$ (mol/L)   | 0.0032 | 0.3540 | 0.2675 | 0.2051 | 0.1574 | 0.1211 | 0.0937  | 0.0727  | 0.0562  | 0.0435  | 0.0341  | 0.0263  | 0.0206  |
| $C_P$ (mol/L)       | 0.0000 | 0.0297 | 0.1205 | 0.1830 | 0.2303 | 0.2653 | 0.2926  | 0.3131  | 0.3290  | 0.3410  | 0.3524  | 0.3581  | 0.3632  |
| $C_{CIDMI}$ (mol/L) | 0.0000 | 0.0191 | 0.0121 | 0.0110 | 0.0107 | 0.0108 | 0.0107  | 0.0108  | 0.0109  | 0.0110  | 0.0109  | 0.0110  | 0.0113  |
| $C_{FDMI}$ (mol/L)  | 0.0002 | 0.0012 | 0.0038 | 0.0049 | 0.0056 | 0.0068 | 0.0070  | 0.0074  | 0.0080  | 0.0085  | 0.0065  | 0.0085  | 0.0090  |

**Table S18. Measured data corresponding to run 12**

|                     |        |        |        |        |        |        |         |         |         |         |         |         |         |
|---------------------|--------|--------|--------|--------|--------|--------|---------|---------|---------|---------|---------|---------|---------|
| time(h)             | 0      | 0.2917 | 2.2917 | 4.2917 | 6.2917 | 8.2917 | 10.2917 | 12.2917 | 14.2917 | 16.2917 | 18.2917 | 20.2917 | 22.2917 |
| $C_{SM}$ (mol/L)    | 0.4018 | 0.0000 | 0.0000 | 0.0000 | 0.0000 | 0.0000 | 0.0000  | 0.0000  | 0.0000  | 0.0000  | 0.0000  | 0.0000  | 0.0000  |
| $C_{Int}$ (mol/L)   | 0.0017 | 0.2732 | 0.1424 | 0.0720 | 0.0362 | 0.0184 | 0.0095  | 0.0051  | 0.0028  | 0.0015  | 0.0009  | 0.0006  | 0.0004  |
| $C_P$ (mol/L)       | 0.0000 | 0.0808 | 0.2186 | 0.2867 | 0.3210 | 0.3376 | 0.3444  | 0.3477  | 0.3499  | 0.3508  | 0.3513  | 0.3513  | 0.3508  |
| $C_{CIDMI}$ (mol/L) | 0.0000 | 0.0388 | 0.0235 | 0.0212 | 0.0203 | 0.0199 | 0.0198  | 0.0195  | 0.0192  | 0.0190  | 0.0187  | 0.0185  | 0.0181  |
| $C_{FDMI}$ (mol/L)  | 0.0004 | 0.0111 | 0.0195 | 0.0240 | 0.0264 | 0.0280 | 0.0303  | 0.0317  | 0.0321  | 0.0327  | 0.0330  | 0.0336  | 0.0346  |

**Table S19. Measured data corresponding to run 13**

|                     |        |        |        |        |        |        |         |         |         |         |         |         |         |
|---------------------|--------|--------|--------|--------|--------|--------|---------|---------|---------|---------|---------|---------|---------|
| time(h)             | 0      | 0.2917 | 2.2917 | 4.2917 | 6.2917 | 8.2917 | 10.2917 | 12.2917 | 14.2917 | 16.2917 | 18.2917 | 20.2917 | 22.2917 |
| $C_{SM}$ (mol/L)    | 0.4018 | 0.0003 | 0.0000 | 0.0000 | 0.0000 | 0.0000 | 0.0000  | 0.0000  | 0.0000  | 0.0000  | 0.0000  | 0.0000  | 0.0000  |
| $C_{Int}$ (mol/L)   | 0.0020 | 0.2338 | 0.0169 | 0.0016 | 0.0004 | 0.0003 | 0.0003  | 0.0003  | 0.0003  | 0.0002  | 0.0003  | 0.0003  | 0.0002  |
| $C_P$ (mol/L)       | 0.0000 | 0.1290 | 0.3525 | 0.3547 | 0.3507 | 0.3501 | 0.3454  | 0.3431  | 0.3393  | 0.3366  | 0.3329  | 0.3293  | 0.3262  |
| $C_{CIDMI}$ (mol/L) | 0.0000 | 0.0286 | 0.0182 | 0.0193 | 0.0191 | 0.0184 | 0.0183  | 0.0181  | 0.0180  | 0.0180  | 0.0180  | 0.0181  | 0.0180  |
| $C_{FDMI}$ (mol/L)  | 0.0002 | 0.0122 | 0.0164 | 0.0284 | 0.0339 | 0.0352 | 0.0400  | 0.0425  | 0.0464  | 0.0492  | 0.0528  | 0.0563  | 0.0596  |

**Table S20. Measured data corresponding to run 14**

|                     |        |        |        |        |        |        |         |         |         |         |         |         |         |
|---------------------|--------|--------|--------|--------|--------|--------|---------|---------|---------|---------|---------|---------|---------|
| time(h)             | 0      | 0.2917 | 2.2917 | 4.2917 | 6.2917 | 8.2917 | 10.2917 | 12.2917 | 14.2917 | 16.2917 | 18.2917 | 20.2917 | 22.2917 |
| $C_{SM}$ (mol/L)    | 0.2782 | 0.0001 | 0.0000 | 0.0000 | 0.0000 | 0.0000 | 0.0000  | 0.0000  | 0.0000  | 0.0000  | 0.0000  | 0.0000  | 0.0000  |
| $C_{Int}$ (mol/L)   | 0.0019 | 0.1836 | 0.0236 | 0.0032 | 0.0007 | 0.0003 | 0.0002  | 0.0002  | 0.0002  | 0.0002  | 0.0002  | 0.0002  | 0.0000  |
| $C_P$ (mol/L)       | 0.0000 | 0.0612 | 0.2271 | 0.2472 | 0.2463 | 0.2455 | 0.2440  | 0.2418  | 0.2395  | 0.2382  | 0.2362  | 0.2341  | 0.2324  |
| $C_{CIDMI}$ (mol/L) | 0.0000 | 0.0283 | 0.0184 | 0.0181 | 0.0182 | 0.0180 | 0.0179  | 0.0181  | 0.0181  | 0.0180  | 0.0180  | 0.0180  | 0.0181  |
| $C_{FDMI}$ (mol/L)  | 0.0001 | 0.0072 | 0.0113 | 0.0118 | 0.0151 | 0.0165 | 0.0181  | 0.0202  | 0.0225  | 0.0239  | 0.0260  | 0.0280  | 0.0298  |

**Table S21. Measured data corresponding to run 15**

|                     |        |        |        |        |        |        |         |         |         |         |         |         |         |
|---------------------|--------|--------|--------|--------|--------|--------|---------|---------|---------|---------|---------|---------|---------|
| time(h)             | 0      | 0.2917 | 2.2917 | 4.2917 | 6.2917 | 8.2917 | 10.2917 | 12.2917 | 14.2917 | 16.2917 | 18.2917 | 20.2917 | 22.2917 |
| $C_{SM}$ (mol/L)    | 0.2763 | 0.0004 | 0.0000 | 0.0000 | 0.0000 | 0.0000 | 0.0000  | 0.0000  | 0.0000  | 0.0000  | 0.0000  | 0.0000  | 0.0000  |
| $C_{Int}$ (mol/L)   | 0.0032 | 0.2426 | 0.1199 | 0.0607 | 0.0306 | 0.0155 | 0.0080  | 0.0042  | 0.0023  | 0.0014  | 0.0008  | 0.0005  | 0.0003  |
| $C_P$ (mol/L)       | 0.0005 | 0.0277 | 0.1481 | 0.2067 | 0.2364 | 0.2509 | 0.2576  | 0.2605  | 0.2618  | 0.2621  | 0.2619  | 0.2614  | 0.2610  |
| $C_{CIDMI}$ (mol/L) | 0.0000 | 0.0091 | 0.0097 | 0.0099 | 0.0104 | 0.0103 | 0.0104  | 0.0106  | 0.0105  | 0.0106  | 0.0106  | 0.0106  | 0.0106  |
| $C_{FDMI}$ (mol/L)  | 0.0003 | 0.0006 | 0.0025 | 0.0030 | 0.0029 | 0.0036 | 0.0043  | 0.0050  | 0.0056  | 0.0063  | 0.0070  | 0.0078  | 0.0083  |

**Table S22. Measured data corresponding to run 16**

|                     |        |        |        |        |        |        |         |         |         |         |         |         |         |
|---------------------|--------|--------|--------|--------|--------|--------|---------|---------|---------|---------|---------|---------|---------|
| time(h)             | 0      | 0.2917 | 2.2917 | 4.2917 | 6.2917 | 8.2917 | 10.2917 | 12.2917 | 14.2917 | 16.2917 | 18.2917 | 20.2917 | 22.2917 |
| $C_{SM}$ (mol/L)    | 0.4006 | 0.0000 | 0.0000 | 0.0000 | 0.0000 | 0.0000 | 0.0000  | 0.0000  | 0.0000  | 0.0000  | 0.0000  | 0.0000  | 0.0000  |
| $C_{Int}$ (mol/L)   | 0.0031 | 0.3274 | 0.1368 | 0.0563 | 0.0231 | 0.0097 | 0.0043  | 0.0020  | 0.0011  | 0.0006  | 0.0004  | 0.0003  | 0.0003  |
| $C_P$ (mol/L)       | 0.0000 | 0.0410 | 0.2381 | 0.3189 | 0.3511 | 0.3628 | 0.3671  | 0.3685  | 0.3682  | 0.3676  | 0.3666  | 0.3661  | 0.3643  |
| $C_{CIDMI}$ (mol/L) | 0.0000 | 0.0329 | 0.0235 | 0.0241 | 0.0246 | 0.0249 | 0.0252  | 0.0250  | 0.0251  | 0.0252  | 0.0255  | 0.0252  | 0.0256  |
| $C_{FDMI}$ (mol/L)  | 0.0004 | 0.0027 | 0.0055 | 0.0047 | 0.0052 | 0.0065 | 0.0074  | 0.0085  | 0.0096  | 0.0106  | 0.0115  | 0.0124  | 0.0138  |

**Table S23. Measured data corresponding to run 17**

|                     |        |        |        |        |        |        |         |         |         |         |         |         |         |
|---------------------|--------|--------|--------|--------|--------|--------|---------|---------|---------|---------|---------|---------|---------|
| time(h)             | 0      | 0.2917 | 2.2917 | 4.2917 | 6.2917 | 8.2917 | 10.2917 | 12.2917 | 14.2917 | 16.2917 | 18.2917 | 20.2917 | 22.2917 |
| $C_{SM}$ (mol/L)    | 0.3298 | 0.0000 | 0.0000 | 0.0000 | 0.0000 | 0.0000 | 0.0000  | 0.0000  | 0.0000  | 0.0000  | 0.0000  | 0.0000  | 0.0000  |
| $C_{Int}$ (mol/L)   | 0.0012 | 0.2832 | 0.1228 | 0.0558 | 0.0253 | 0.0117 | 0.0056  | 0.0028  | 0.0014  | 0.0008  | 0.0008  | 0.0000  | 0.0000  |
| $C_P$ (mol/L)       | 0.0000 | 0.0341 | 0.1872 | 0.2519 | 0.2813 | 0.2937 | 0.2988  | 0.2999  | 0.3010  | 0.3010  | 0.3008  | 0.2975  | 0.2963  |
| $C_{CIDMI}$ (mol/L) | 0.0000 | 0.0130 | 0.0160 | 0.0163 | 0.0166 | 0.0164 | 0.0164  | 0.0169  | 0.0164  | 0.0164  | 0.0162  | 0.0168  | 0.0167  |
| $C_{FDMI}$ (mol/L)  | 0.0000 | 0.0007 | 0.0050 | 0.0069 | 0.0078 | 0.0092 | 0.0102  | 0.0113  | 0.0121  | 0.0128  | 0.0132  | 0.0166  | 0.0179  |

**Table S24. Measured data corresponding to run 18**

|                     |        |        |        |        |        |        |         |         |         |         |         |         |         |
|---------------------|--------|--------|--------|--------|--------|--------|---------|---------|---------|---------|---------|---------|---------|
| time(h)             | 0      | 0.2917 | 2.2917 | 4.2917 | 6.2917 | 8.2917 | 10.2917 | 12.2917 | 14.2917 | 16.2917 | 18.2917 | 20.2917 | 22.2917 |
| $C_{SM}$ (mol/L)    | 0.3266 | 0.0000 | 0.0000 | 0.0000 | 0.0000 | 0.0000 | 0.0000  | 0.0000  | 0.0000  | 0.0000  | 0.0000  | 0.0000  | 0.0000  |
| $C_{Int}$ (mol/L)   | 0.0034 | 0.2901 | 0.1385 | 0.0705 | 0.0358 | 0.0182 | 0.0094  | 0.0050  | 0.0027  | 0.0015  | 0.0010  | 0.0006  | 0.0004  |
| $C_P$ (mol/L)       | 0.0010 | 0.0290 | 0.1721 | 0.2379 | 0.2716 | 0.2878 | 0.2958  | 0.2992  | 0.3006  | 0.3013  | 0.3013  | 0.2987  | 0.2980  |
| $C_{CIDMI}$ (mol/L) | 0.0000 | 0.0112 | 0.0151 | 0.0153 | 0.0155 | 0.0156 | 0.0157  | 0.0157  | 0.0158  | 0.0158  | 0.0158  | 0.0158  | 0.0157  |
| $C_{FDMI}$ (mol/L)  | 0.0000 | 0.0007 | 0.0052 | 0.0072 | 0.0080 | 0.0093 | 0.0101  | 0.0110  | 0.0118  | 0.0123  | 0.0128  | 0.0158  | 0.0170  |

**Table S25. Measured data corresponding to run 19**

|                     |        |        |        |        |        |        |         |         |         |         |         |         |         |
|---------------------|--------|--------|--------|--------|--------|--------|---------|---------|---------|---------|---------|---------|---------|
| time(h)             | 0      | 0.2917 | 2.2917 | 4.2917 | 6.2917 | 8.2917 | 10.2917 | 12.2917 | 14.2917 | 16.2917 | 18.2917 | 20.2917 | 22.2917 |
| $C_{SM}$ (mol/L)    | 0.2474 | 0.0003 | 0.0000 | 0.0000 | 0.0000 | 0.0000 | 0.0000  | 0.0000  | 0.0000  | 0.0000  | 0.0000  | 0.0000  | 0.0000  |
| $C_{Int}$ (mol/L)   | 0.0824 | 0.2839 | 0.1208 | 0.0542 | 0.0240 | 0.0109 | 0.0050  | 0.0025  | 0.0012  | 0.0007  | 0.0003  | 0.0003  | 0.0000  |
| $C_P$ (mol/L)       | 0.0010 | 0.0461 | 0.1952 | 0.2620 | 0.2905 | 0.3020 | 0.3064  | 0.3079  | 0.3079  | 0.3080  | 0.3074  | 0.3050  | 0.3053  |
| $C_{CIDMI}$ (mol/L) | 0.0000 | 0.0003 | 0.0109 | 0.0096 | 0.0106 | 0.0115 | 0.0121  | 0.0123  | 0.0125  | 0.0121  | 0.0122  | 0.0125  | 0.0122  |
| $C_{FDMI}$ (mol/L)  | 0.0002 | 0.0004 | 0.0041 | 0.0052 | 0.0058 | 0.0066 | 0.0074  | 0.0083  | 0.0094  | 0.0102  | 0.0110  | 0.0132  | 0.0135  |

**Table S26. Measured data corresponding to run 20**

|                     |        |        |        |        |        |        |         |         |         |         |         |         |         |
|---------------------|--------|--------|--------|--------|--------|--------|---------|---------|---------|---------|---------|---------|---------|
| time(h)             | 0      | 0.2917 | 2.2917 | 4.2917 | 6.2917 | 8.2917 | 10.2917 | 12.2917 | 14.2917 | 16.2917 | 18.2917 | 20.2917 | 22.2917 |
| $C_{SM}$ (mol/L)    | 0.3197 | 0.0000 | 0.0000 | 0.0000 | 0.0000 | 0.0000 | 0.0000  | 0.0000  | 0.0000  | 0.0000  | 0.0000  | 0.0000  | 0.0000  |
| $C_{Int}$ (mol/L)   | 0.0101 | 0.2609 | 0.1249 | 0.0591 | 0.0280 | 0.0134 | 0.0065  | 0.0033  | 0.0017  | 0.0010  | 0.0005  | 0.0004  | 0.0000  |
| $C_P$ (mol/L)       | 0.0012 | 0.0432 | 0.1823 | 0.2455 | 0.2749 | 0.2887 | 0.2944  | 0.2971  | 0.2975  | 0.2987  | 0.2983  | 0.2963  | 0.2962  |
| $C_{CIDMI}$ (mol/L) | 0.0000 | 0.0243 | 0.0172 | 0.0176 | 0.0177 | 0.0176 | 0.0177  | 0.0176  | 0.0174  | 0.0174  | 0.0172  | 0.0173  | 0.0173  |
| $C_{FDMI}$ (mol/L)  | 0.0000 | 0.0026 | 0.0066 | 0.0087 | 0.0105 | 0.0113 | 0.0124  | 0.0130  | 0.0143  | 0.0139  | 0.0149  | 0.0170  | 0.0175  |



**Table S27. Measured data corresponding to run 21**

| time(h)             | 0      | 0.2917 | 2.2917 | 4.2917 | 6.2917 | 8.2917 | 10.2917 | 12.2917 | 14.2917 | 16.2917 | 18.2917 | 20.2917 | 22.2917 |
|---------------------|--------|--------|--------|--------|--------|--------|---------|---------|---------|---------|---------|---------|---------|
| $C_{SM}$ (mol/L)    | 0.3227 | 0.0000 | 0.0000 | 0.0000 | 0.0000 | 0.0000 | 0.0000  | 0.0000  | 0.0000  | 0.0000  | 0.0000  | 0.0000  | 0.0000  |
| $C_{Int}$ (mol/L)   | 0.0071 | 0.2588 | 0.1184 | 0.0534 | 0.0243 | 0.0112 | 0.0053  | 0.0026  | 0.0013  | 0.0007  | 0.0004  | 0.0003  | 0.0000  |
| $C_P$ (mol/L)       | 0.0010 | 0.0454 | 0.1903 | 0.2526 | 0.2804 | 0.2930 | 0.2984  | 0.3004  | 0.3006  | 0.3012  | 0.3008  | 0.2992  | 0.2985  |
| $C_{CIDMI}$ (mol/L) | 0.0000 | 0.0236 | 0.0168 | 0.0173 | 0.0176 | 0.0175 | 0.0174  | 0.0173  | 0.0174  | 0.0172  | 0.0169  | 0.0170  | 0.0170  |
| $C_{FDMI}$ (mol/L)  | 0.0002 | 0.0032 | 0.0056 | 0.0076 | 0.0087 | 0.0092 | 0.0099  | 0.0106  | 0.0116  | 0.0119  | 0.0128  | 0.0144  | 0.0155  |

**Table S28. Measured data corresponding to run 22**

| time(h)             | 0      | 0.2917 | 2.2917 | 4.2917 | 6.2917 | 8.2917 | 10.2917 | 12.2917 | 14.2917 | 16.2917 | 18.2917 | 20.2917 | 22.2917 |
|---------------------|--------|--------|--------|--------|--------|--------|---------|---------|---------|---------|---------|---------|---------|
| $C_{SM}$ (mol/L)    | 0.3239 | 0.0000 | 0.0000 | 0.0000 | 0.0000 | 0.0000 | 0.0000  | 0.0000  | 0.0000  | 0.0000  | 0.0000  | 0.0000  | 0.0000  |
| $C_{Int}$ (mol/L)   | 0.0058 | 0.2646 | 0.1246 | 0.0583 | 0.0274 | 0.0131 | 0.0063  | 0.0032  | 0.0017  | 0.0009  | 0.0005  | 0.0004  | 0.0000  |
| $C_P$ (mol/L)       | 0.0011 | 0.0429 | 0.1843 | 0.2481 | 0.2777 | 0.2912 | 0.2979  | 0.3002  | 0.3008  | 0.3012  | 0.3007  | 0.2988  | 0.2982  |
| $C_{CIDMI}$ (mol/L) | 0.0000 | 0.0204 | 0.0161 | 0.0162 | 0.0163 | 0.0166 | 0.0165  | 0.0164  | 0.0164  | 0.0163  | 0.0163  | 0.0165  | 0.0164  |
| $C_{FDMI}$ (mol/L)  | 0.0002 | 0.0031 | 0.0060 | 0.0083 | 0.0095 | 0.0100 | 0.0103  | 0.0112  | 0.0122  | 0.0125  | 0.0135  | 0.0153  | 0.0164  |

**Table S29. Measured data corresponding to run 23**

| time(h)             | 0      | 0.2917 | 2.2917 | 4.2917 | 6.2917 | 8.2917 | 10.2917 | 12.2917 | 14.2917 | 16.2917 | 18.2917 | 20.2917 | 22.2917 |
|---------------------|--------|--------|--------|--------|--------|--------|---------|---------|---------|---------|---------|---------|---------|
| $C_{SM}$ (mol/L)    | 0.3275 | 0.0002 | 0.0000 | 0.0000 | 0.0000 | 0.0000 | 0.0000  | 0.0000  | 0.0000  | 0.0000  | 0.0000  | 0.0000  | 0.0000  |
| $C_{Int}$ (mol/L)   | 0.0033 | 0.2551 | 0.1241 | 0.0594 | 0.0279 | 0.0134 | 0.0065  | 0.0033  | 0.0017  | 0.0010  | 0.0006  | 0.0004  | 0.0003  |
| $C_P$ (mol/L)       | 0.0000 | 0.0532 | 0.1842 | 0.2474 | 0.2779 | 0.2924 | 0.2990  | 0.3017  | 0.3020  | 0.3019  | 0.3025  | 0.3010  | 0.3012  |
| $C_{CIDMI}$ (mol/L) | 0.0000 | 0.0200 | 0.0159 | 0.0156 | 0.0156 | 0.0155 | 0.0154  | 0.0154  | 0.0154  | 0.0154  | 0.0154  | 0.0153  | 0.0152  |
| $C_{FDMI}$ (mol/L)  | 0.0002 | 0.0026 | 0.0068 | 0.0085 | 0.0096 | 0.0097 | 0.0100  | 0.0106  | 0.0118  | 0.0127  | 0.0125  | 0.0142  | 0.0142  |

**Table S30. Measured data corresponding to run 24**

| time(h)             | 0      | 0.2917 | 2.2917 | 4.2917 | 6.2917 | 8.2917 | 10.2917 | 12.2917 | 14.2917 | 16.2917 | 18.2917 | 20.2917 | 22.2917 |
|---------------------|--------|--------|--------|--------|--------|--------|---------|---------|---------|---------|---------|---------|---------|
| $C_{SM}$ (mol/L)    | 0.3284 | 0.0000 | 0.0000 | 0.0000 | 0.0000 | 0.0000 | 0.0000  | 0.0000  | 0.0000  | 0.0000  | 0.0000  | 0.0000  | 0.0000  |
| $C_{Int}$ (mol/L)   | 0.0024 | 0.2612 | 0.1226 | 0.0569 | 0.0264 | 0.0123 | 0.0059  | 0.0030  | 0.0016  | 0.0009  | 0.0006  | 0.0004  | 0.0004  |
| $C_P$ (mol/L)       | 0.0000 | 0.0456 | 0.1881 | 0.2523 | 0.2818 | 0.2947 | 0.3000  | 0.3029  | 0.3024  | 0.3028  | 0.3021  | 0.3010  | 0.2998  |
| $C_{CIDMI}$ (mol/L) | 0.0000 | 0.0211 | 0.0144 | 0.0144 | 0.0145 | 0.0146 | 0.0147  | 0.0147  | 0.0149  | 0.0147  | 0.0147  | 0.0147  | 0.0148  |
| $C_{FDMI}$ (mol/L)  | 0.0002 | 0.0029 | 0.0059 | 0.0074 | 0.0083 | 0.0093 | 0.0104  | 0.0104  | 0.0121  | 0.0126  | 0.0136  | 0.0148  | 0.0160  |

**Table S31. Experimental data for run 25**

| <b>Time (h)</b> | <b><math>C_{SM}</math> (mol/ L)</b> | <b><math>C_{CIDMI}</math> (mol/ L)</b> | <b><math>C_{QS1Cl}</math> (mol/ L)</b> |
|-----------------|-------------------------------------|----------------------------------------|----------------------------------------|
| 0.15            | 0.1696                              | 0.0469                                 | 0.1495                                 |
| 0.23            | 0.1705                              | 0.0641                                 | 0.1314                                 |
| 0.32            | 0.1711                              | 0.0799                                 | 0.1151                                 |
| 0.48            | 0.1733                              | 0.1253                                 | 0.0674                                 |
| 0.65            | 0.1737                              | 0.1376                                 | 0.0547                                 |
| 0.82            | 0.1742                              | 0.1474                                 | 0.0444                                 |
| 0.98            | 0.1743                              | 0.1551                                 | 0.0366                                 |
| 1.15            | 0.1748                              | 0.1600                                 | 0.0312                                 |
| 1.65            | 0.1751                              | 0.1725                                 | 0.0184                                 |
| 2.15            | 0.1752                              | 0.1786                                 | 0.0122                                 |
| 2.65            | 0.1751                              | 0.1822                                 | 0.0087                                 |
| 3.15            | 0.1753                              | 0.1842                                 | 0.0065                                 |
| 4.15            | 0.1753                              | 0.1868                                 | 0.0040                                 |
| 5.15            | 0.1755                              | 0.1879                                 | 0.0026                                 |
| 6.15            | 0.1748                              | 0.1895                                 | 0.0018                                 |
| 7.15            | 0.1746                              | 0.1900                                 | 0.0014                                 |
| 8.15            | 0.1741                              | 0.1908                                 | 0.0012                                 |
| 9.15            | 0.1741                              | 0.1911                                 | 0.0009                                 |
| 10.15           | 0.1744                              | 0.1909                                 | 0.0007                                 |
| 11.15           | 0.1743                              | 0.1911                                 | 0.0007                                 |
| 12.15           | 0.1742                              | 0.1913                                 | 0.0005                                 |
| 13.15           | 0.1743                              | 0.1912                                 | 0.0005                                 |
| 14.15           | 0.1743                              | 0.1913                                 | 0.0004                                 |
| 15.15           | 0.1744                              | 0.1913                                 | 0.0004                                 |

Table S32. Experimental data for run 26

| Time (h) | $C_{SM}$ (mol/ L) | $C_{CLDMI}$ (mol/ L) | $C_{QS1Cl}$ (mol/ L) |
|----------|-------------------|----------------------|----------------------|
| 0.15     | 0.1740            | 0.0151               | 0.1770               |
| 0.23     | 0.1745            | 0.0215               | 0.1700               |
| 0.32     | 0.1746            | 0.0282               | 0.1632               |
| 0.48     | 0.1749            | 0.0383               | 0.1529               |
| 0.65     | 0.1753            | 0.0497               | 0.1410               |
| 0.82     | 0.1759            | 0.0590               | 0.1312               |
| 0.98     | 0.1763            | 0.0683               | 0.1214               |
| 1.15     | 0.1767            | 0.0753               | 0.1141               |
| 1.65     | 0.1780            | 0.0960               | 0.0920               |
| 2.15     | 0.1785            | 0.1122               | 0.0753               |
| 2.65     | 0.1789            | 0.1240               | 0.0631               |
| 3.15     | 0.1795            | 0.1340               | 0.0525               |
| 4.15     | 0.1804            | 0.1481               | 0.0376               |
| 5.15     | 0.1808            | 0.1575               | 0.0277               |
| 6.15     | 0.1809            | 0.1662               | 0.0189               |
| 7.15     | 0.1812            | 0.1698               | 0.0151               |
| 8.15     | 0.1812            | 0.1724               | 0.0124               |
| 9.15     | 0.1811            | 0.1746               | 0.0103               |
| 10.15    | 0.1813            | 0.1762               | 0.0086               |
| 11.15    | 0.1813            | 0.1774               | 0.0074               |
| 12.15    | 0.1811            | 0.1785               | 0.0064               |
| 13.15    | 0.1812            | 0.1792               | 0.0056               |
| 14.15    | 0.1812            | 0.1799               | 0.0050               |
| 15.15    | 0.1810            | 0.1805               | 0.0044               |
